# Supplementary material for: Dataset of differential gene expression between total normal human thyroid and histologically normal thyroid adjacent to papillary thyroid carcinoma
Source: PubMed Central journal article supplement — Data Brief. 2019 Mar 15;24:103835. doi: 10.1016/j.dib.2019.103835 (PMC6479735; doi:10.1016/j.dib.2019.103835), 2019-03-15
Supplement: mmc2.pdf [file mmc2.pdf]

**Supplementary Table 1.** Samples selected for the meta-analysis of gene expression profiles in total thyroid (Pool A), histologically normal thyroid adjacent to papillary thyroid carcinoma (Pool B).

| Study ID                                                                             | Sample ID                                | Age                   | Sex                     | Sample type   | Sample collection                                                        | Post-mortem interval | Platform               | Microarray                                              | Spots  | References           |
|--------------------------------------------------------------------------------------|------------------------------------------|-----------------------|-------------------------|---------------|--------------------------------------------------------------------------|----------------------|------------------------|---------------------------------------------------------|--------|----------------------|
| <b>Pool A - Total thyroid</b> (27,275 mapped loci following analysis by TRAM) (n=35) |                                          |                       |                         |               |                                                                          |                      |                        |                                                         |        |                      |
| A1 - A2<br>n=2                                                                       | NO1 - NO2*<br>(E-MEXP-2442) <sup>a</sup> | N/A (adult)           | 2 F                     | Whole thyroid | Institutions participating in the study                                  | N/A                  | A-AFFY-44*<br>(GPL570) | Affymetrix U133 Plus 2.0                                | 54,675 | (Borup et al., 2010) |
| A3 - A4<br>n=2                                                                       | GSM2836<br>GSM2848                       | N/A                   | N/A                     | "             | Commercial human thyroid RNA                                             | N/A                  | GPL91                  | Affymetrix U95A                                         | 12,626 | (Su et al., 2002)    |
| A5 - A6<br>n=2                                                                       | GSM18802 - 03                            | N/A                   | M/F mix                 | "             | Commercial and Institutions participating in the human thyroid RNA study | N/A                  | GPL1074                | GNF1H                                                   | 22,639 | (Su et al., 2004)    |
| A7 - A8<br>n=2                                                                       | GSM18961 - 62                            | N/A                   | M/F mix                 | "             | "                                                                        | N/A                  | GPL96                  | Affymetrix U133A                                        | 22,283 | (Su et al., 2004)    |
| A9<br>n=1                                                                            | GSM44685                                 | N/A                   | M/F mix                 | "             | Commercial human thyroid RNA                                             | N/A                  | GPL96                  | Affymetrix U133A                                        | 22,283 | (Ge et al., 2005)    |
| A10...A13<br>n=4                                                                     | GSM80864...67                            | 25y, 38y,<br>39y, 30y | 3 M<br>1 F              | "             | Institutions participating in the study                                  | 0 h - 8.5 h          | GPL570                 | Affimetric U133 Plus 2.0                                | 54,675 | (Roth et al., 2006)  |
| A14...A18<br>n=5                                                                     | GSM175954<br>GSM176418...21              | N/A                   | 1 M/F<br>mix 3 M<br>1 F | "             | "                                                                        | N/A                  | GPL570                 | Affimetric U133 Plus 2.0                                | 54,675 | N/A                  |
| A19...A21<br>n=3                                                                     | GSM194528...30                           | N/A                   | N/A                     | "             | Commercial human thyroid RNA                                             | N/A                  | GPL2986                | ABI Human Genome Survey Microarray Version 2            | 32,878 | (Dezso et al., 2008) |
| A22 - A23<br>n=2                                                                     | GSM201392 - 93                           | N/A                   | M/F mix                 | "             | "                                                                        | N/A                  | GPL1291                | Hitachisoft AceGene Human Oligo Chip 30K 1 Chip Version | 30,336 | (Kato et al., 2008)  |
| A24...A31                                                                            | GSM422030...37                           | 68y                   | 8 F                     | "             | "                                                                        | N/A                  | GPL6254                | Phalanx Human                                           | 30,968 | (Abu-Khudir          |

|                                                                                                                        |                                                                         |                                                            |            |                                                                            |                                         |     |        |                                                              |        |                                                |
|------------------------------------------------------------------------------------------------------------------------|-------------------------------------------------------------------------|------------------------------------------------------------|------------|----------------------------------------------------------------------------|-----------------------------------------|-----|--------|--------------------------------------------------------------|--------|------------------------------------------------|
| n=8                                                                                                                    |                                                                         |                                                            |            |                                                                            |                                         |     |        | OneArray                                                     |        | et al., 2010)                                  |
| A32...A35<br>n=4                                                                                                       | GSM671268...71                                                          | N/A                                                        | N/A        | "                                                                          | Institutions participating in the study | N/A | GPL96  | Affymetrix U133A                                             | 22,283 | (Giordano et al., 2006; Giordano et al., 2005) |
| <b>Pool B - Thyroid adjacent to papillary thyroid carcinoma (33,242 mapped loci following analysis by TRAM) (n=40)</b> |                                                                         |                                                            |            |                                                                            |                                         |     |        |                                                              |        |                                                |
| B1...B9<br>n=9                                                                                                         | GSM77362 - 64 - 66 - 68 - - 70 - 72 - 74 - 76 - 78                      | 42 y, 43 y, 33 y, 56 y, 36 y, 48 y, 43 y, 65 y, 31 y       | 5 M<br>4F  | Normal thyroid tissue adjacent to papillary thyroid carcinoma (PTC) tumors | "                                       | "   | GPL570 | [HG-U133_Plus_2] Affymetrix Human Genome U133 Plus 2.0 Array | 54,675 | (He et al., 2005)                              |
| B10...B16<br>n=7                                                                                                       | GSM85215...21                                                           | N/A                                                        | N/A        | "                                                                          | N/A                                     | N/A | "      | "                                                            | "      | N/A                                            |
| B17...B20<br>n=4                                                                                                       | GSM139002...05                                                          | 71 y, 34 y, 29 y, 21 y                                     | 1 M<br>3 F | Normal thyroid tissue adjacent to papillary thyroid carcinoma (PTC) tumors | "                                       | N/A | GPL570 | [HG-U133_Plus_2] Affymetrix Human Genome U133 Plus 2.0 Array | 54,675 | (Vasko et al., 2007)                           |
| B21...B40<br>n=20                                                                                                      | GSM723329...38 - GSM723349 - 51 - 53 - 55 - 57 - 59 - 61 - 63 - 65 - 67 | 37 y, 29 y, 36 y, 38 y, 32 y, 59 y, 68 y, 68 y, 33 y, 47 y | 5 M<br>5 F | "                                                                          | "                                       | N/A | "      | "                                                            | "      | N/A                                            |

From the left to right: our study ID; GEO (Gene Expression Omnibus) sample ID; sex, when it is available; sample type; sample collection; post-mortem interval (PMI) before freezing; GEO platform name; platform type; platform spot number and GEO experiment reference. All sample IDs and platforms IDs marked with \* are related to ArrayExpress database. <sup>a</sup>This is the ArrayExpress experiment number provided because the only sample number does not allow to identify data source. N/A: not available.

## REFERENCES

- Abu-Khudir, R., Paquette, J., Lefort, A., Libert, F., Chanoine, J.P., Vassart, G., Deladoey, J., 2010. Transcriptome, methylome and genomic variations analysis of ectopic thyroid glands. *PLoS One* 5, e13420.
- Borup, R., Rossing, M., Henao, R., Yamamoto, Y., Krogh, A., Godballe, C., Winther, O., Kiss, K., Christensen, L., Hogdall, E. et al., 2010. Molecular signatures of thyroid follicular neoplasia. *Endocr. Relat. Cancer* 17, 691-708.
- Dezso, Z., Nikolsky, Y., Sviridov, E., Shi, W., Serebriyskaya, T., Dosymbekov, D., Bugrim, A., Rakhmatulin, E., Brennan, R.J., Guryanov, A. et al., 2008. A comprehensive functional analysis of tissue specificity of human gene expression. *BMC Biol.* 6, 49.
- Ge, X., Yamamoto, S., Tsutsumi, S., Midorikawa, Y., Ihara, S., Wang, S.M., Aburatani, H., 2005. Interpreting expression profiles of cancers by genome-wide survey of breadth of expression in normal tissues. *Genomics* 86, 127-141.

- Giordano, T.J., Au, A.Y., Kuick, R., Thomas, D.G., Rhodes, D.R., Wilhelm, K.G., Jr., Vinco, M., Misek, D.E., Sanders, D., Zhu, Z. et al., 2006. Delineation, functional validation, and bioinformatic evaluation of gene expression in thyroid follicular carcinomas with the PAX8-PPARG translocation. *Clin. Cancer Res.* 12, 1983-1993.
- Giordano, T.J., Kuick, R., Thomas, D.G., Misek, D.E., Vinco, M., Sanders, D., Zhu, Z., Ciampi, R., Roh, M., Shedden, K. et al., 2005. Molecular classification of papillary thyroid carcinoma: distinct BRAF, RAS, and RET/PTC mutation-specific gene expression profiles discovered by DNA microarray analysis. *Oncogene* 24, 6646-6656.
- He, H., Jazdzewski, K., Li, W., Liyanarachchi, S., Nagy, R., Volinia, S., Calin, G.A., Liu, C.G., Franssila, K., Suster, S. et al., 2005. The role of microRNA genes in papillary thyroid carcinoma. *Proceedings of the National Academy of Sciences of the United States of America* 102, 19075-19080.
- Kato, M., Miya, F., Kanemura, Y., Tanaka, T., Nakamura, Y., Tsunoda, T., 2008. Recombination rates of genes expressed in human tissues. *Hum. Mol. Genet.* 17, 577-586.
- Roth, R.B., Hevezi, P., Lee, J., Willhite, D., Lechner, S.M., Foster, A.C., Zlotnik, A., 2006. Gene expression analyses reveal molecular relationships among 20 regions of the human CNS. *Neurogenetics* 7, 67-80.
- Su, A.I., Cooke, M.P., Ching, K.A., Hakak, Y., Walker, J.R., Wiltshire, T., Orth, A.P., Vega, R.G., Sapinoso, L.M., Moqrich, A. et al., 2002. Large-scale analysis of the human and mouse transcriptomes. *Proc. Natl. Acad. Sci. U. S. A.* 99, 4465-4470.
- Su, A.I., Wiltshire, T., Batalov, S., Lapp, H., Ching, K.A., Block, D., Zhang, J., Soden, R., Hayakawa, M., Kreiman, G. et al., 2004. A gene atlas of the mouse and human protein-encoding transcriptomes. *Proc. Natl. Acad. Sci. U. S. A.* 101, 6062-6067.
- Vasko, V., Espinosa, A.V., Scouten, W., He, H., Auer, H., Liyanarachchi, S., Larin, A., Savchenko, V., Francis, G.L., de la Chapelle, A. et al., 2007. Gene expression and functional evidence of epithelial-to-mesenchymal transition in papillary thyroid carcinoma invasion. *Proceedings of the National Academy of Sciences of the United States of America* 104, 2803-2808.
